# Supplementary material for: The role of MEGF10 in myoblast fusion and hypertrophic response to overload of skeletal muscle
Source: Research Square preprint supplement (doi:10.21203/rs.3.rs-5295425/v1), 2024-10-30
Supplement: Supplementary file [file 9b5d10a8fbe2c9cbb9493780.pdf]

**In vivo and in vitro analyses of MEGF10 function demonstrate its role in myoblast fusion and hypertrophic response to overload of skeletal muscle**

**Louise Richardson, Ruth Hughes, Colin A Johnson, Stuart Egginton, Michelle Peckham**

**Supplementary Material**

**Supplementary Tables**

**Supplemental Table 1: Primary Antibodies used:**

| Antibody            | Source              | Species | Dilution (IF) | Dilution (WB) |
|---------------------|---------------------|---------|---------------|---------------|
| A4.1025             | ATCC hybridoma      | Mouse   | 1:10          | N/A           |
| c-myc (9E10)        | Sigma               | Mouse   | N/A           | 1:5000        |
| GFP (AB10145)       | Millipore           | Rabbit  | N/A           | 1:1000        |
| Pax7 supernatant.   | DSHB (hybridoma)    | Mouse   | 1:20          | N/A           |
| MyoD (MA1-41017)    | Thermo Scientific   | Mouse   | 1:100         | 1:500         |
| MyoD (C-20)         | Santa Cruz (sc-304) | Rabbit  | 1:2000        | N/A           |
| Myogenin (F5D)      | DSHB                | Mouse   | 1:50          | 1:1000        |
| Myogenin (MA511486) | Invitrogen          | Mouse   | 1:50          | N/A           |
| Laminin L9393       | Sigma               | Rabbit  | 1:30          | N/A           |
| DAPI 40043          | Sigma               | N/A     | 1:500         | N/A           |

**Supplemental Table 2. Genotypic ratio of mice born from Megf10<sup>+/-</sup> matings.** Total number of WT, heterozygous and homozygous mice and corresponding ratio.

|              | <b>WT</b> | <b>Heterozygous</b> | <b>Homozygous</b> |
|--------------|-----------|---------------------|-------------------|
| <b>Total</b> | 13        | 20                  | 6                 |
| <b>Ratio</b> | 2         | 3                   | 1                 |

## Supplementary figures

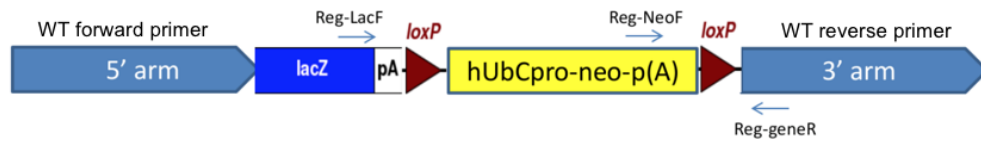

**Supplementary Fig. 1. Primer strategy for TaqMan assay for genotyping mice.** Schematic showing forward and reverse primer, human ubiquitin C gene promoter (hUbCpro-neo-p(A)) selection cassette flanked by loxP sites and lacZ sequence within the mutant (tm1) allele. Primers used in genotyping used sequence from lacZ (Reg-LacF) and the neomycin selection cassette (tm1a allele: Reg Neo-F), the reverse primer Reg-geneR. The readout of LAC Z<sup>+</sup> WT<sup>+</sup> = heterozygous, LAC Z<sup>+</sup> WT<sup>-</sup> = homozygous, and LAC Z<sup>-</sup> WT<sup>+</sup> = wild-type.

Sequences of the genotype primers were: LAC-Z: Forward primer: CGATCGTAATCACCCGAGTGT; Reverse primer: CCGTGGCCTGACTCATTC, Reporter 1: CCAGCGACCAGATGAT; Reporter 2: N/A

And for MEGF10-1 WT; Forward primer: CTACCGGACAGCCTACCG; Reverse primer: CTTTCATAAAATCCTGGGCAACACT; Reporter 1: TATAGACGCAAATCCC, Reporter 2: N/A

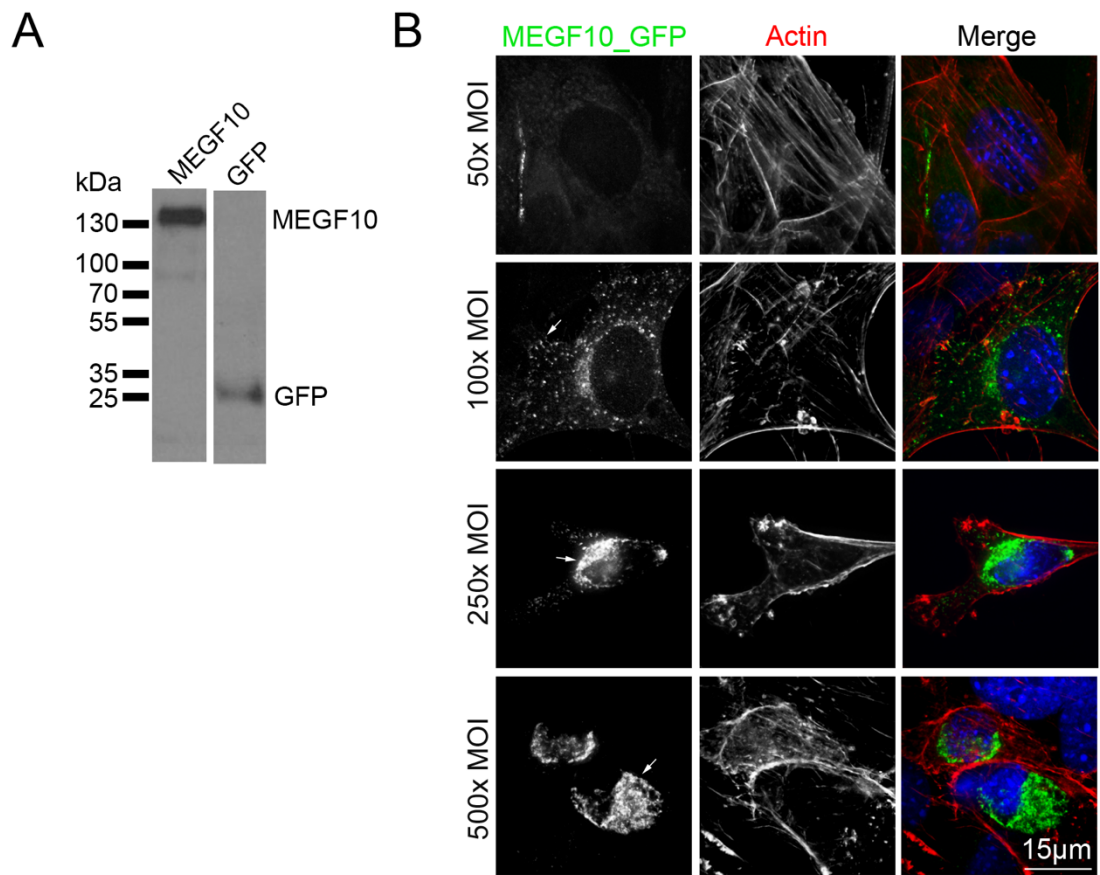

**Supplemental Fig. 2: eGFP and eGFP-MEGF10 expression tests.** **A:** anti-GFP blots for MEGF10-eGFP and the GFP adenovirus expressed in cells. **B:** Localisation of MEGF10-EGFP at different MOIs. At an MOI of 50, very little signal is observed. At an MOI of 100, MEGF10-eGFP is found in vesicles and at the plasma membrane (arrowed). At MOIs of 250 and 500, most of the MEGF10-EGFP is in the Golgi (arrowed)

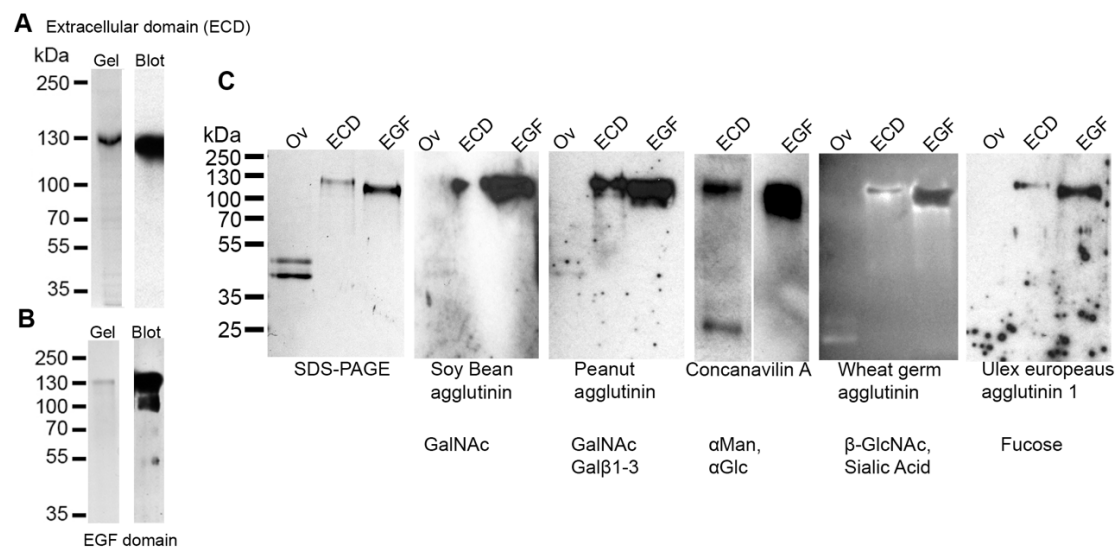

**Supplemental Fig 3: Expression, purification and Lectin blots for ECD and EGF.** **A and B:** Gels and blots (anti-Myc Tag) for purified extracellular domain (ECD) (**A**) and EGF domains (**B**) of MEGF10 to show the purified protein and any contaminants. **C:** SDS Page gels of Ovalbumin (Ov), ECD and EGF domains together with lectin blots using each of the specific lectins, and what they recognise, as shown.
